# Supplementary material
Source: HighWire-hosted journal article supplement (https://erj.ersjournals.com/content/57/4/2002485)
Supplement: inline-supplementary-material-2 [file inline-supplementary-material-2.pdf]

**Supplementary Table S2.** Types of malignancies in the Vanderbilt cohort and distribution across the Brock and BRODERS classification

| <b>Histology</b>                      | <b>Brock &lt; 5%</b> | <b>5% &lt;= Brock &lt; 65%</b> | <b>Brock &gt;= 65%</b> | <b>BRODERS Benign</b> | <b>BRODERS Malignant</b> |
|---------------------------------------|----------------------|--------------------------------|------------------------|-----------------------|--------------------------|
| <b>Adenocarcinoma (N=60)</b>          | 2                    | 57                             | 1                      | 3                     | 57                       |
| <b>Squamous cell carcinoma (N=24)</b> | 2                    | 21                             | 1                      | 1                     | 23                       |
| <b>Large cell carcinoma (N=3)</b>     | 0                    | 3                              | 0                      | 0                     | 3                        |
| <b>Small Cell carcinoma (N=3)</b>     | 0                    | 3                              | 0                      | 1                     | 2                        |
| <b>Carcinoid (N=1)</b>                | 0                    | 1                              | 0                      | 1                     | 0                        |
