# Supplementary material
Source: HighWire-hosted journal article supplement (https://erj.ersjournals.com/content/57/4/2002485)
Supplement: inline-supplementary-material-4 [file inline-supplementary-material-4.pdf]

**Supplementary Table S4** Effect of different Brock cutoffs the intermediate probability group on BRODERS diagnostic performance in the Vanderbilt University cohort.

|                     | Brock Score Cutoffs for the Intermediate Group |                        |                        |                         |                        |                        |
|---------------------|------------------------------------------------|------------------------|------------------------|-------------------------|------------------------|------------------------|
|                     | 5-60                                           | 5-65                   | 5-70                   | 10-60                   | 10-65                  | 10-70                  |
| TN                  | 19                                             | 19                     | 19                     | 10                      | 10                     | 10                     |
| FP                  | 22                                             | 22                     | 22                     | 13                      | 13                     | 13                     |
| FN                  | 5                                              | 5                      | 5                      | 4                       | 4                      | 4                      |
| TP                  | 78                                             | 80                     | 81                     | 70                      | 72                     | 73                     |
| Sensitivity         | 0.94<br>(0.938-0.941)                          | 0.94<br>(0.939-0.943)  | 0.942<br>(0.94-0.943)  | 0.946<br>(0.9440-0.948) | 0.947<br>(0.946-0.949) | 0.948<br>(0.946-0.95)  |
| Specificity         | 0.463<br>(0.458-0.468)                         | 0.463<br>(0.459-0.468) | 0.463<br>(0.456-0.468) | 0.435<br>(0.428-0.441)  | 0.435<br>(0.428-0.441) | 0.435<br>(0.428-0.441) |
| PPV                 | 0.78<br>(0.777-0.783)                          | 0.784<br>(0.782-0.786) | 0.786<br>(0.784-0.789) | 0.843<br>(0.841-0.846)  | 0.847<br>(0.845-0.85)  | 0.849<br>(0.846-0.851) |
| NPV                 | 0.792<br>(0.786-0.797)                         | 0.792<br>(0.786-0.797) | 0.792<br>(0.786-0.797) | 0.714<br>(0.707-0.722)  | 0.714<br>(0.707-0.722) | 0.714<br>(0.707-0.722) |
| BRR %               | 22                                             | 21.57                  | 21.36                  | 15.66                   | 15.29                  | 15.11                  |
| Brock-AUC<br>95% CI | 0.793<br>(0.711-0.861)                         | 0.798<br>(0.717-0.864) | 0.8<br>(0.72-0.866)    | 0.743<br>(0.644-0.826)  | 0.749<br>(0.652-0.831) | 0.753<br>(0.656-0.834) |
| Rad- AUC<br>95 % CI | 0.854<br>(0.779-0.911)                         | 0.856<br>(0.782-0.912) | 0.857<br>(0.784-0.913) | 0.85<br>(0.763-0.915)   | 0.852<br>(0.767-0.916) | 0.854<br>(0.769-0.916) |

TN – True Negatives; FP – False Positives; FN – False Negatives; TP – True Positives; PPV – Positive Predictive Value, NPV – Negative Predictive Value; BRR – Benign Resection Rate; Rad-AUC – Radiomics AUC
